# Supplementary material for: Experiences of Relatedness during Enforced Remote Work among Employees in Higher Education
Source: MDPI journal article supplement (doi:10.3390/challe13020055), 2022-10-26
Supplement: s1 [file s1]

Archive with 1 entries (1 files):
- challenges-1726827-supplementary.pdf
